# Supplementary material
Source: PubMed Central journal article supplement (PMC3084614)

Supplemental Figure 1

Grade 0 = benign

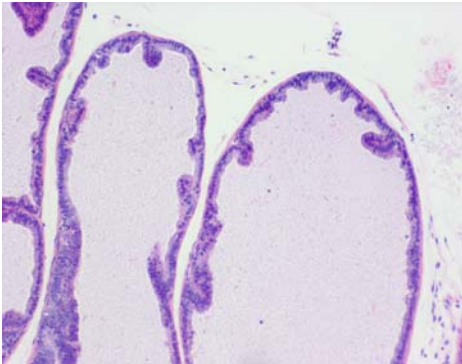

Grade 1 = PIN without cribriform

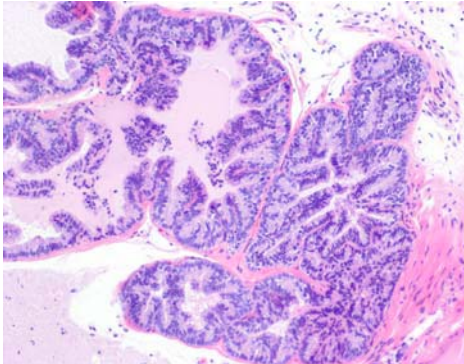

Grade 2 = PIN with cribriform

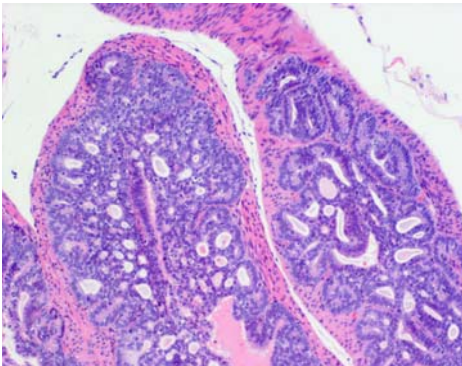

Grade 3 = Intraductal carcinoma

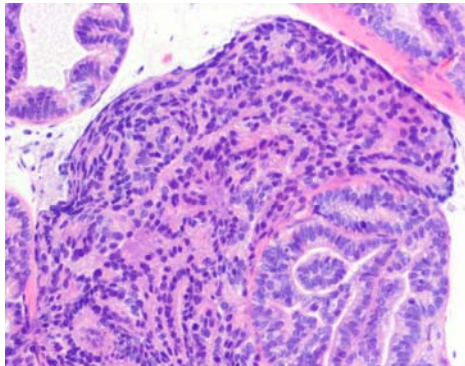

Grade 4 = Moderately differentiated carcinoma

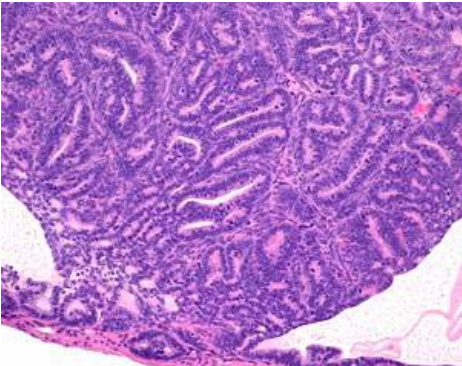

Grade 5 = small cell carcinoma

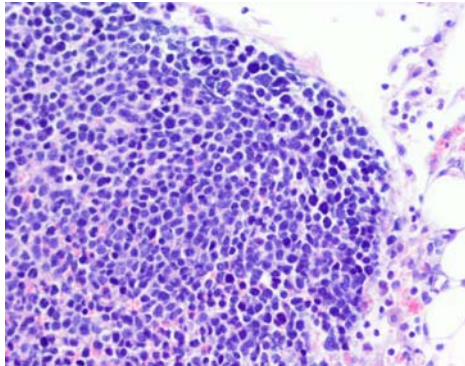

Supplement: NIHMS281401-supplement-sup_data_1.pdf [file NIHMS281401-supplement-sup_data_1.pdf]
