# Supplementary material
Source: PubMed Central journal article supplement (PMC3084614)

Supplemental Figure 4

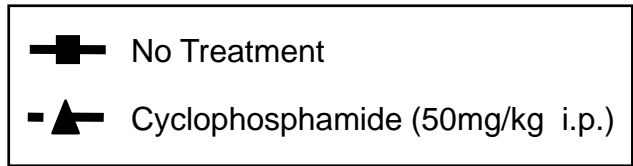

% CD4<sup>+</sup> CD25<sup>+</sup>; PI<sup>-</sup> Annexin5<sup>+</sup>

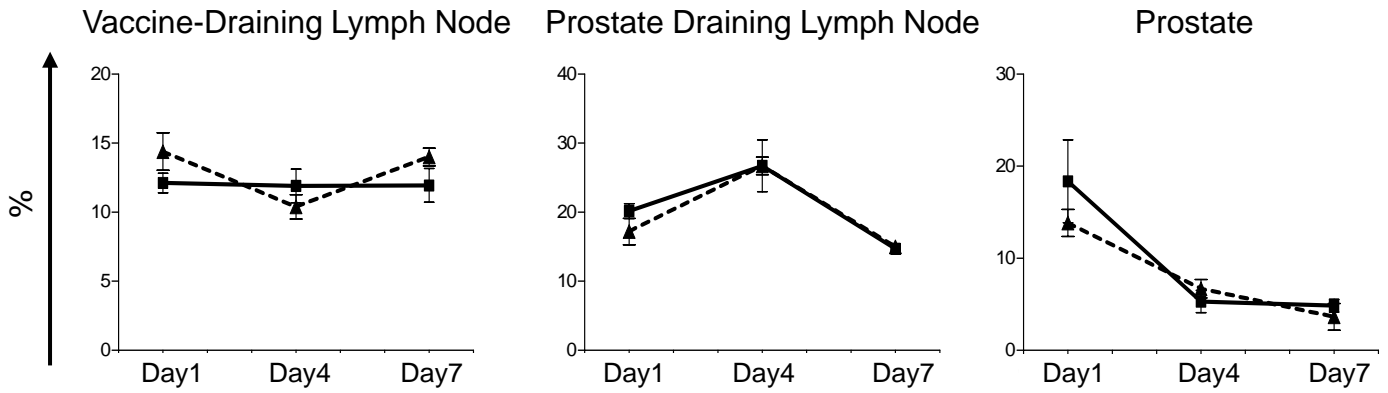

% CD4<sup>+</sup> FOXP3<sup>+</sup>; BCL-2<sup>+</sup>

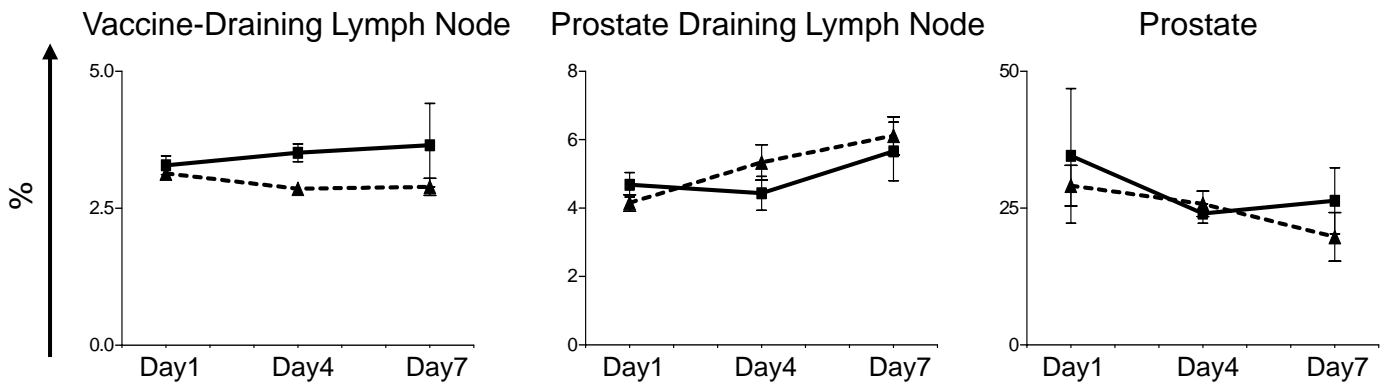

Supplement: NIHMS281401-supplement-sup_data_4.pdf [file NIHMS281401-supplement-sup_data_4.pdf]
