# Supplementary material
Source: PubMed Central journal article supplement (PMC3084614)
Supplement: NIHMS281401-supplement-sup_data_5.pdf [file NIHMS281401-supplement-sup_data_5.pdf]

Supplemental Figure 5

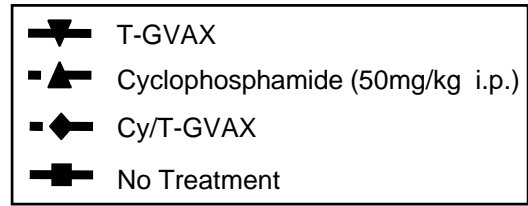

# CD11c<sup>high</sup>CD8<sup>-</sup>B220<sup>-</sup> cells

# CD11c<sup>high</sup>CD8<sup>+</sup>B220<sup>-</sup> cells

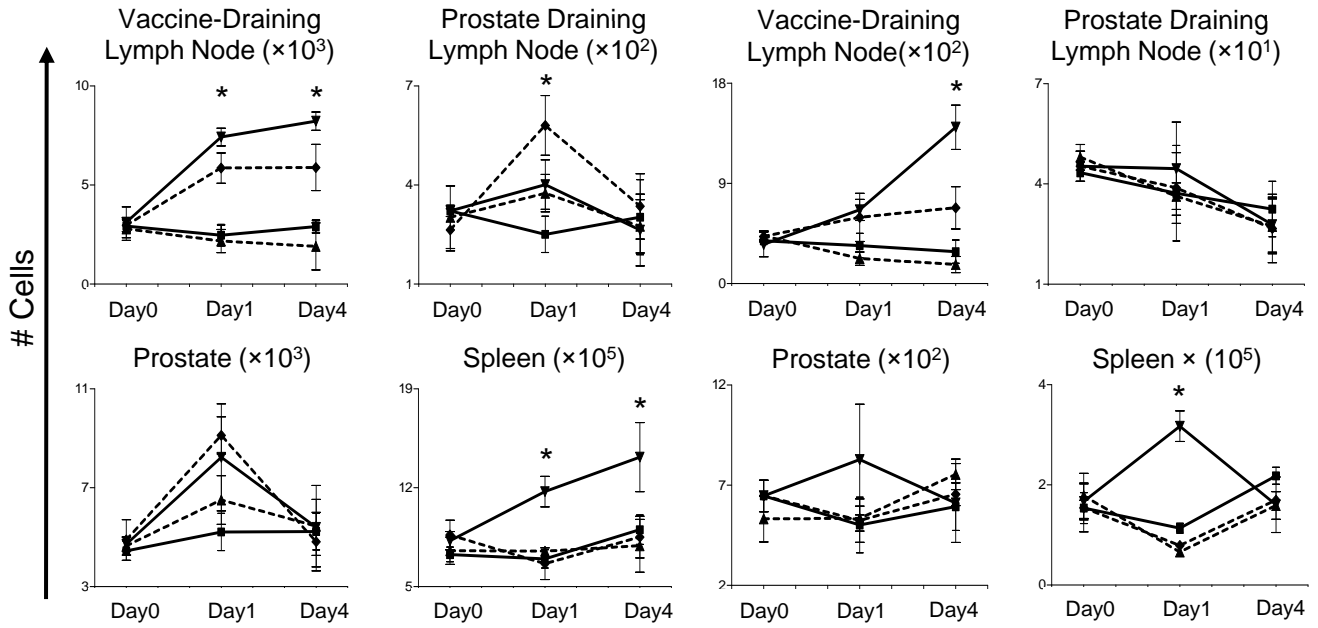

\* P<0.05 Cy/T-GVAX vs T-GVAX alone
