# Supplementary material
Source: PubMed Central journal article supplement (PMC3084614)

Supplemental Figure 2

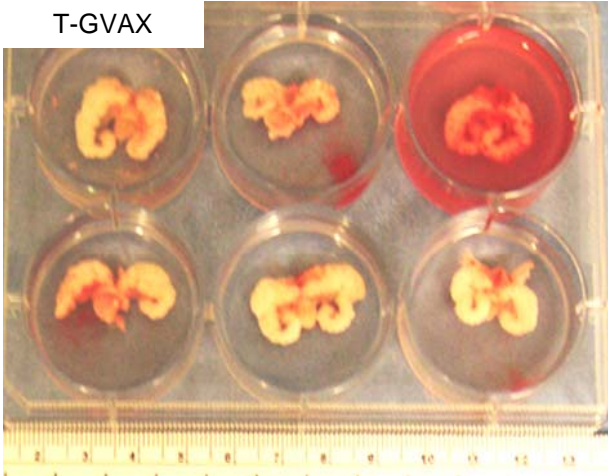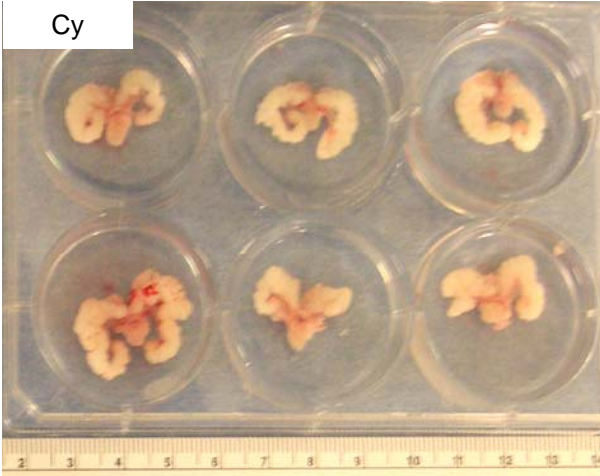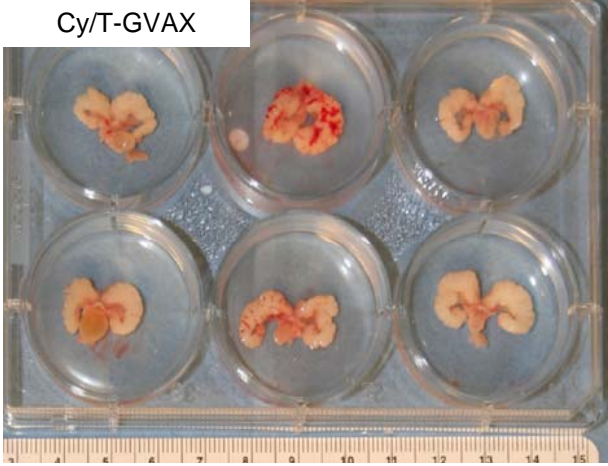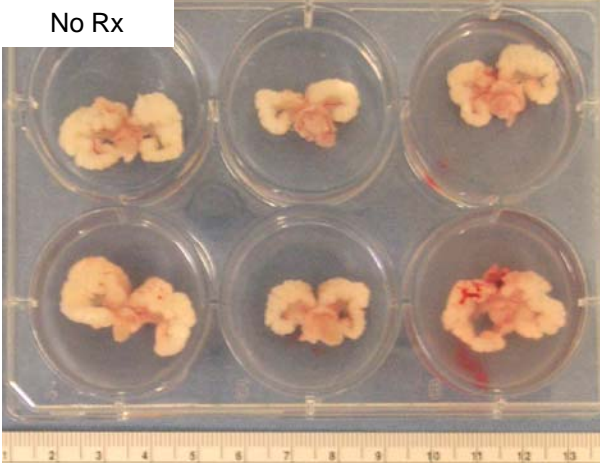

Supplement: NIHMS281401-supplement-sup_data_2.pdf [file NIHMS281401-supplement-sup_data_2.pdf]

Supplemental Figure 3

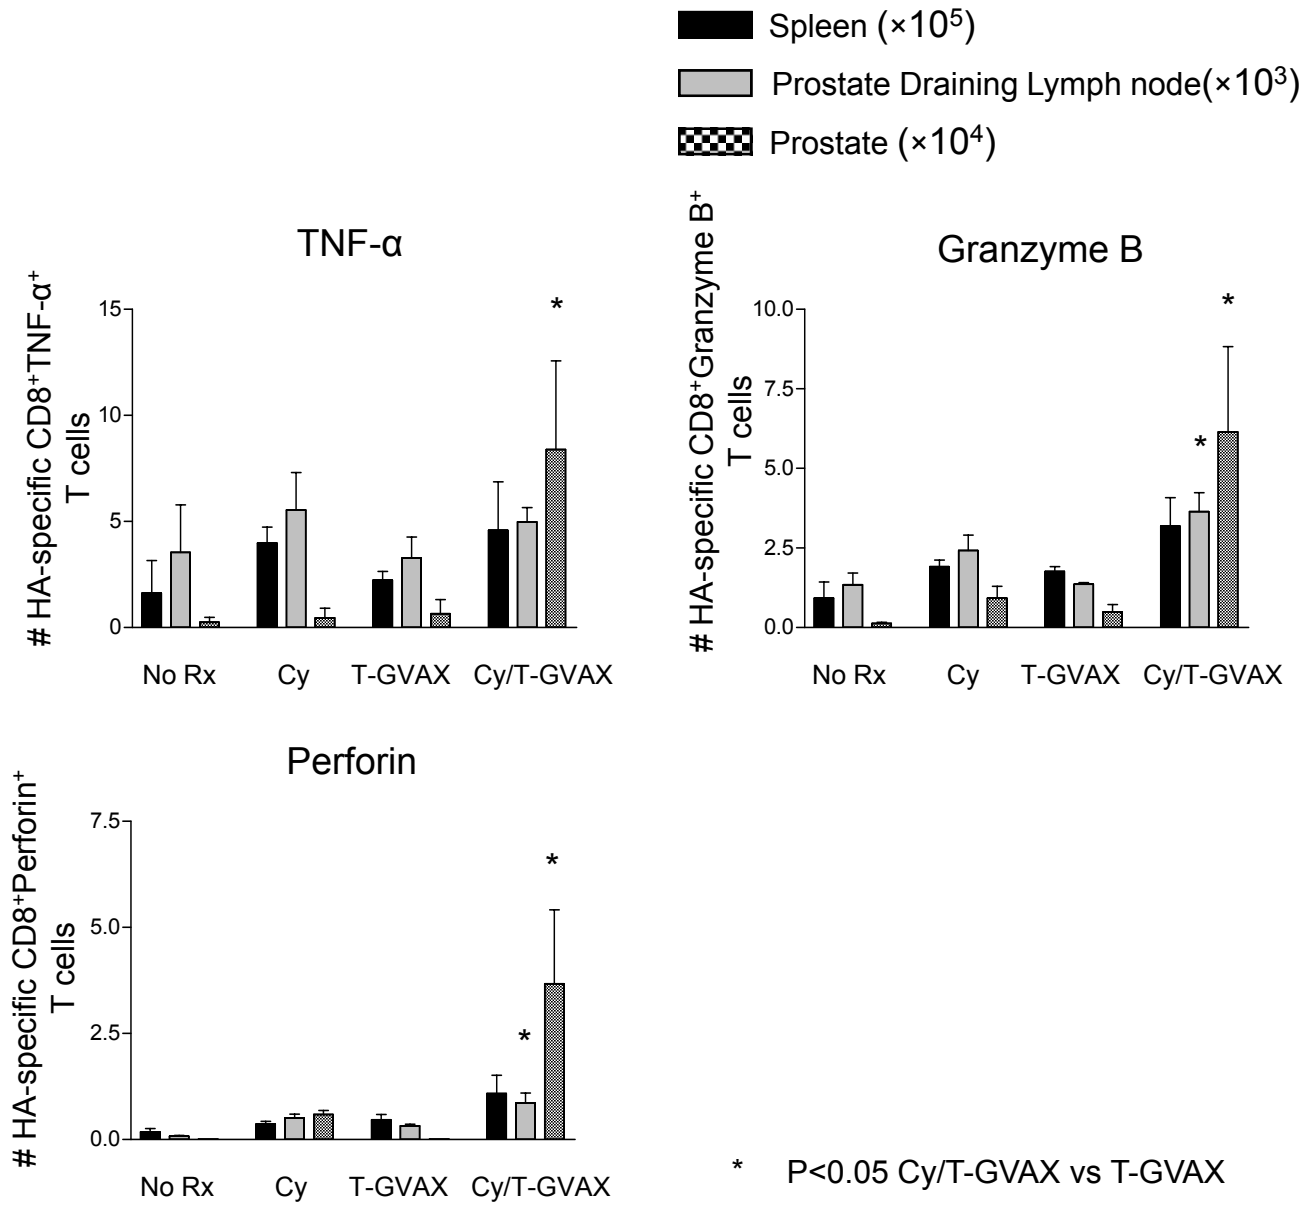

Supplement: NIHMS281401-supplement-sup_data_3.pdf [file NIHMS281401-supplement-sup_data_3.pdf]

Supplemental Figure 6

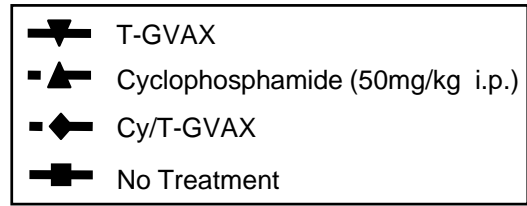

CD11c<sup>high</sup>CD8<sup>-</sup>B220<sup>-</sup> cells

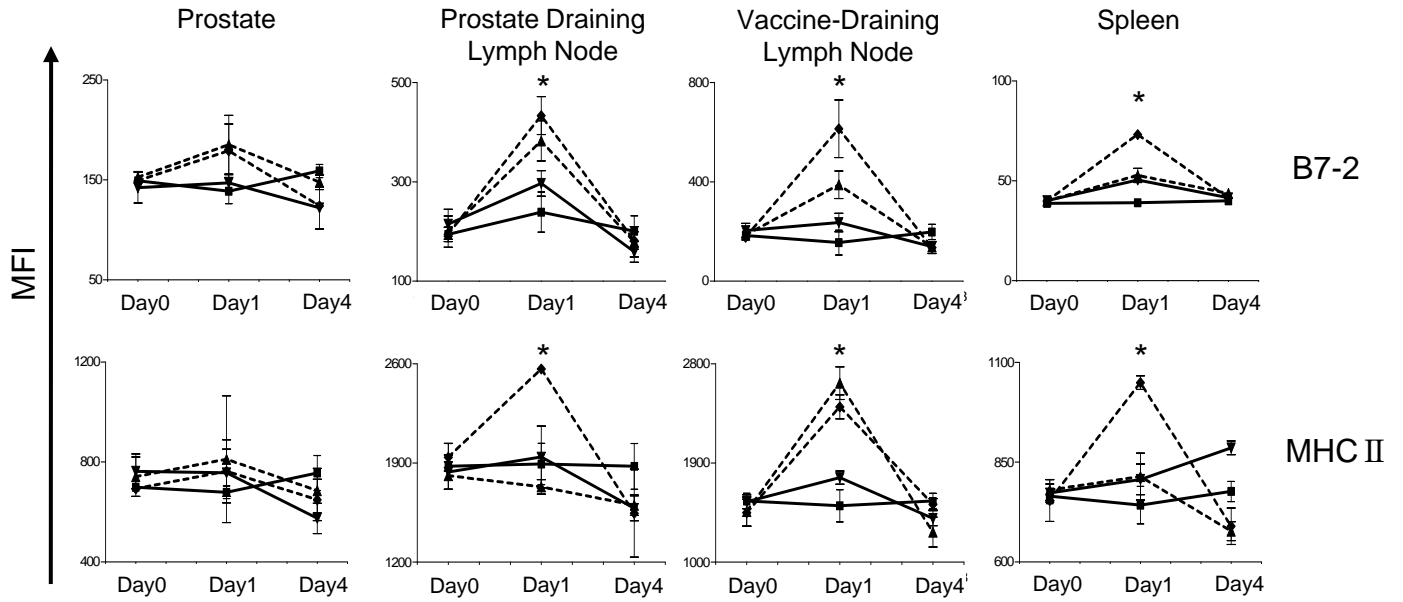

\* P < 0.05 Cy/T-GVAX vs T-GVAX alone

Supplement: NIHMS281401-supplement-sup_data_6.pdf [file NIHMS281401-supplement-sup_data_6.pdf]

Supplemental Figure 7

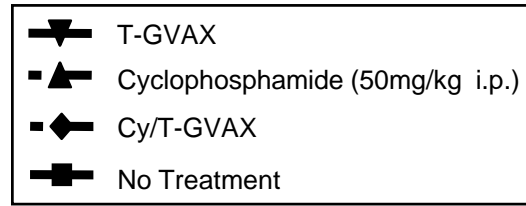

**CD11c<sup>high</sup>CD8<sup>+</sup>B220<sup>-</sup> cells**

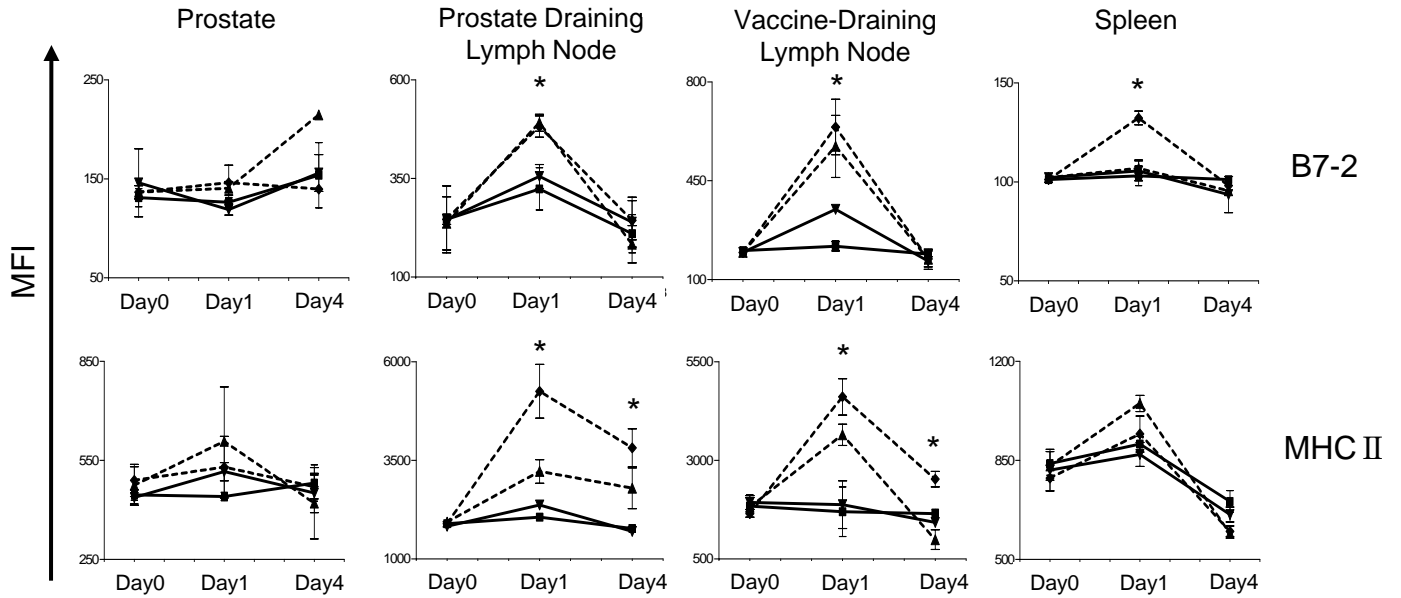

\* P < 0.05 Cy/T-GVAX vs T-GVAX alone

Supplement: NIHMS281401-supplement-sup_data_7.pdf [file NIHMS281401-supplement-sup_data_7.pdf]
